# Supplementary material for: Bibliometric Analysis of 100 Top‐Cited Articles in Gastric Disease
Source: Hindawi journal article supplement (doi:10.1155/2020/2672373), 2020-01-01
Supplement: f1 [file 2672373.f1.pdf]

## Bibliometric analysis of 100 top-cited articles in gastric disease

Fangfang Yuan<sup>1,2</sup>, Jizhen Cai<sup>2</sup>, Bin Liu<sup>3</sup>, Xiaowei Tang<sup>4,5</sup>

**Table S1** The 100 top-cited papers in gastric disease.

| Rank | Title                                                                                                                                                                                                    | No. of citations | Citation per year |
|------|----------------------------------------------------------------------------------------------------------------------------------------------------------------------------------------------------------|------------------|-------------------|
| 1    | The two histological main types of gastric carcinoma: diffuse and so-called intestinal-type carcinoma. A attempt at a histo-clinical classification. <i>Acta Pathol Microbiol Scand</i> . 1965;64:31-49. | 4017             | 77.25             |
| 2    | Unidentified curved bacilli in the stomach of patients with gastritis and peptic ulceration. <i>Lancet</i> . 1984;1(8390):1311-5.                                                                        | 3474             | 105.27            |
| 3    | The complete genome sequence of the gastric pathogen <i>Helicobacter pylori</i> . <i>Nature</i> . 1997;388(6642):539-47.                                                                                 | 3330             | 166.5             |
| 4    | Classification and grading of gastritis. The updated Sydney System. International Workshop on the Histopathology of Gastritis, Houston 1994. <i>Am J Surg Pathol</i> . 1996;20(10):1161-81.              | 3304             | 157.33            |
| 5    | <i>Helicobacter pylori</i> infection and the risk of gastric carcinoma. <i>N Engl J Med</i> . 1991;325:1127-31.                                                                                          | 3113             | 119.73            |
| 6    | Gain-of-function mutations of c-kit in human gastrointestinal stromal tumors. <i>Science</i> . 1998;279:577-80.                                                                                          | 2787             | 146.68            |
| 7    | <i>Helicobacter pylori</i> infection and the development of gastric cancer. <i>N Engl J Med</i> . 2001;345:784-9.                                                                                        | 2490             | 155.63            |
| 8    | Unidentified curved bacilli on gastric epithelium in active chronic gastritis. <i>Lancet</i> . 1983;1:1273-5.                                                                                            | 2432             | 71.53             |
| 9    | Perioperative chemotherapy versus surgery alone for resectable gastroesophageal cancer. <i>N Engl J Med</i> . 2006 Jul 6;355(1):11-20.                                                                   | 2405             | 218.64            |
| 10   | Chemoradiotherapy after surgery compared with surgery alone for adenocarcinoma of the stomach or gastroesophageal junction. <i>N Engl J Med</i> . 2001;345:725-30.                                       | 2048             | 128               |
| 11   | Human gastric carcinogenesis: a multistep and multifactorial process--First American Cancer Society Award Lecture on Cancer Epidemiology and Prevention. <i>Cancer research</i> . 1992;52:6735-40.       | 2023             | 80.92             |
| 12   | Genomic-sequence comparison of two unrelated isolates of the human gastric pathogen <i>Helicobacter pylori</i> . <i>Nature</i> . 1999;397:176-80.                                                        | 1988             | 110.4             |
| 13   | Rising incidence of adenocarcinoma of the esophagus and gastric cardia. <i>JAMA</i> . 1991;265:1287-9.                                                                                                   | 1923             | 73.96             |
| 14   | Interleukin-1 polymorphisms associated with increased risk of gastric cancer. <i>Nature</i> . 2000;404:398-402.                                                                                          | 1679             | 98.76             |
| 15   | Regression of primary low-grade B-cell gastric lymphoma of mucosa-associated lymphoid tissue type after eradication of                                                                                   | 1666             | 69.42             |

*Helicobacter pylori*. Lancet. 1993;342(8871):575-7.

|    |                                                                                                                                                                                                                                                                               |      |        |
|----|-------------------------------------------------------------------------------------------------------------------------------------------------------------------------------------------------------------------------------------------------------------------------------|------|--------|
| 16 | Changing patterns in the incidence of esophageal and gastric carcinoma in the United States. Cancer. 1998;83:2049-53.                                                                                                                                                         | 1568 | 82.53  |
| 17 | <i>Helicobacter pylori</i> infection. N Engl J Med. 2002;347:1175-86.                                                                                                                                                                                                         | 1564 | 104.27 |
| 18 | <i>Helicobacter pylori</i> infection and gastric carcinoma among Japanese Americans in Hawaii. N Engl J Med. 1991;325:1132-6.                                                                                                                                                 | 1556 | 59.85  |
| 19 | Plasma ghrelin levels after diet-induced weight loss or gastric bypass surgery. N Engl J Med. 2002;346:1623-30.                                                                                                                                                               | 1479 | 98.6   |
| 20 | <i>Helicobacter pylori</i> infection and gastric lymphoma. N Engl J Med. 1994;330:1267-71.                                                                                                                                                                                    | 1466 | 63.74  |
| 21 | <i>Helicobacter pylori</i> -associated gastritis and primary B-cell gastric lymphoma. Lancet. 1991;338:1175-6.                                                                                                                                                                | 1441 | 55.42  |
| 22 | Trastuzumab in combination with chemotherapy versus chemotherapy alone for treatment of HER2-positive advanced gastric or gastro-oesophageal junction cancer (ToGA): a phase 3, open-label, randomised controlled trial. Lancet. 2010;376: 687-697.                           | 1440 | 205.71 |
| 23 | Current concepts in the management of <i>Helicobacter pylori</i> infection: the maastricht III consensus report. Gut. 2007;56(6):772-81.                                                                                                                                      | 1337 | 133.7  |
| 24 | Gastrostomy without laparotomy: a percutaneous endoscopic technique. J Pediatr Surg. 1980;15(6):872-5.                                                                                                                                                                        | 1328 | 35.89  |
| 25 | Long-term mortality after gastric bypass surgery. N Engl J Med. 2007;357:753-761.                                                                                                                                                                                             | 1317 | 131.7  |
| 26 | Adjuvant chemotherapy for gastric cancer with S-1, an oral fluoropyrimidine. N Engl J Med. 2007;357:1810-1820.                                                                                                                                                                | 1245 | 124.5  |
| 27 | Infection with <i>Helicobacter pylori</i> strains possessing <i>cagA</i> is associated with an increased risk of developing adenocarcinoma of the stomach. Cancer Res. 1995;55(10):2111-5.                                                                                    | 1228 | 55.82  |
| 28 | The Vienna classification of gastrointestinal epithelial neoplasia. Gut. 2000;47:251-5.                                                                                                                                                                                       | 1177 | 69.24  |
| 29 | Association between infection with <i>Helicobacter pylori</i> and risk of gastric cancer: evidence from a prospective investigation. BMJ. 1991;302: 1302-1305.                                                                                                                | 1150 | 44.23  |
| 30 | Gastrointestinal stromal tumors--definition, clinical, histological, immunohistochemical, and molecular genetic features and differential diagnosis. Virchows Arch. 2001;438(1):1-12.                                                                                         | 1107 | 69.19  |
| 31 | Trastuzumab in combination with chemotherapy versus chemotherapy alone for treatment of HER2-positive advanced gastric or gastro-oesophageal junction cancer (TOGA): a phase 3, open-label, randomised controlled trial (vol 376, pg 687, 2010). Lancet. 2010;376: 1302-1302. | 1098 | 156.86 |
| 32 | Extended lymph-node dissection for gastric cancer. N Engl J Med. 1999;340:908-14.                                                                                                                                                                                             | 1095 | 60.83  |

|    |                                                                                                                                                                                                                              |      |        |
|----|------------------------------------------------------------------------------------------------------------------------------------------------------------------------------------------------------------------------------|------|--------|
| 33 | Helicobacter pylori and gastrointestinal tract adenocarcinomas. Nat Rev Cancer. 2002;2(1):28-37.                                                                                                                             | 1094 | 72.93  |
| 34 | Phase III study of docetaxel and cisplatin plus fluorouracil compared with cisplatin and fluorouracil as first-line therapy for advanced gastric cancer: a report of the V325 Study Group. J Clin Oncol. 2006;24(31):4991-7. | 1051 | 95.55  |
| 35 | Attempt to fulfil Koch's postulates for pyloric Campylobacter. Med J Aust. 1985;142(8):436-9.                                                                                                                                | 1046 | 32.69  |
| 36 | Epidemiology of gastric cancer. World journal of gastroenterology. 2006;12:354-62.                                                                                                                                           | 1036 | 94.18  |
| 37 | Current concepts in the management of Helicobacter pylori infection--the Maastricht 2-2000 Consensus Report. Aliment Pharmacol Ther. 2002;16(2):167-80.                                                                      | 1033 | 68.87  |
| 38 | Helicobacter pylori. Clinical microbiology reviews. 1997;10:720-41.                                                                                                                                                          | 1020 | 51     |
| 39 | E-cadherin germline mutations in familial gastric cancer. Nature. 1998;392:402-5.                                                                                                                                            | 1010 | 53.16  |
| 40 | A human model of gastric carcinogenesis. Cancer research. 1988;48:3554-60.                                                                                                                                                   | 995  | 34.31  |
| 41 | S-1 plus cisplatin versus S-1 alone for first-line treatment of advanced gastric cancer (SPIRITS trial): a phase III trial. Lancet Oncol. 2008;9(3):215-21.                                                                  | 992  | 110.22 |
| 42 | Endoscopic mucosal resection for treatment of early gastric cancer. Gut. 2001;48:225-9.                                                                                                                                      | 989  | 61.81  |
| 43 | Risk for serious gastrointestinal complications related to use of nonsteroidal anti-inflammatory drugs. A meta-analysis. Ann Intern Med. 1991;115(10):787-96.                                                                | 969  | 37.27  |
| 44 | Japanese classification of gastric carcinoma: 3rd English edition. Gastric Cancer. 2011;14(2):101-12.                                                                                                                        | 957  | 159.5  |
| 45 | Effect of treatment of Helicobacter pylori infection on the long-term recurrence of gastric or duodenal ulcer. A randomized, controlled study. Annals of internal medicine. 1992;116:705-8.                                  | 955  | 38.2   |
| 46 | Prospective double-blind trial of duodenal ulcer relapse after eradication of Campylobacter pylori. Lancet. 1998;2:1437-42.                                                                                                  | 949  | 49.95  |
| 47 | Patient survival after D1 and D2 resections for gastric cancer: long-term results of the MRC randomized surgical trial. Surgical Co-operative Group. Br J Cancer. 1999;79(9-10):1522-30.                                     | 921  | 51.17  |
| 48 | Gastric cancer originating from bone marrow-derived cells. Science. 2004 ;306(5701):1568-71.                                                                                                                                 | 879  | 67.62  |
| 49 | Pathogenesis of Helicobacter pylori infection. Clinical microbiology reviews. 2006;19:449-90.                                                                                                                                | 877  | 79.73  |
| 50 | Campylobacter pyloridis-associated chronic active antral gastritis. A prospective study of its prevalence and the effects of antibacterial and antiulcer treatment. Gastroenterology. 1988;94(1):33-40.                      | 877  | 30.24  |
| 51 | Translocation of Helicobacter pylori CagA into gastric epithelial cells                                                                                                                                                      | 871  | 51.24  |

|    |                                                                                                                                                                                                           |     |       |
|----|-----------------------------------------------------------------------------------------------------------------------------------------------------------------------------------------------------------|-----|-------|
|    | by type IV secretion. <i>Science</i> . 2000;287:1497-500.                                                                                                                                                 |     |       |
| 52 | The Sydney System: histological division. <i>Journal of gastroenterology and hepatology</i> . 1991;6:209-22                                                                                               | 869 | 33.42 |
| 53 | Causal relationship between the loss of RUNX3 expression and gastric cancer. <i>Cell</i> . 2002;109:113-24.                                                                                               | 859 | 57.27 |
| 54 | Laparoscopy-assisted Billroth I gastrectomy. <i>Surgical laparoscopy &amp; endoscopy</i> . 1994;4:146-8.                                                                                                  | 840 | 36.52 |
| 55 | <i>Helicobacter pylori</i> eradication to prevent gastric cancer in a high-risk region of China: a randomized controlled trial. <i>JAMA</i> . 2002;291:187-94.                                            | 837 | 55.8  |
| 56 | Outcomes after laparoscopic Roux-en-Y gastric bypass for morbid obesity. <i>Ann Surg</i> . 2000;232(4):515-29.                                                                                            | 830 | 48.82 |
| 57 | Attachment of <i>Helicobacter pylori</i> to human gastric epithelium mediated by blood group antigens. <i>Science</i> . 1993;262:1892-5.                                                                  | 827 | 34.46 |
| 58 | <i>Helicobacter pylori</i> virulence and genetic geography. <i>Science</i> . 1999;284:1328-33.                                                                                                            | 821 | 45.61 |
| 59 | Relevant prognostic factors in gastric cancer: ten-year results of the German Gastric Cancer Study. <i>Ann Surg</i> . 1998;228:449-61.                                                                    | 820 | 43.16 |
| 60 | High blood alcohol levels in women. The role of decreased gastric alcohol dehydrogenase activity and first-pass metabolism. <i>N Engl J Med</i> . 1990;322:95-9.                                          | 811 | 30.04 |
| 61 | Gastrointestinal stromal tumors of the stomach: a clinicopathologic, immunohistochemical, and molecular genetic study of 1765 cases with long-term follow-up. <i>Am J Surg Pathol</i> . 2005;29(1):52-68. | 785 | 65.42 |
| 62 | Regression of primary gastric lymphoma of mucosa-associated lymphoid-tissue type after cure of <i>Helicobacter-pylori</i> infection. <i>Lancet</i> . 1995;345:1591-4.                                     | 783 | 35.59 |
| 63 | Gastrointestinal stromal tumors: pathology and prognosis at different sites. <i>Semin Diagn Pathol</i> . 2006;23(2):70-83.                                                                                | 782 | 71.09 |
| 64 | <i>Helicobacter pylori</i> infection induces gastric cancer in mongolian gerbils. <i>Gastroenterology</i> . 1998;115(3):642-8.                                                                            | 774 | 40.74 |
| 65 | Ingestion of <i>Campylobacter pyloridis</i> causes gastritis and raised fasting gastric pH. <i>Am J Gastroenterol</i> . 1987;82(3):192-9.                                                                 | 774 | 25.8  |
| 66 | Gastrointestinal stromal tumors: review on morphology, molecular pathology, prognosis, and differential diagnosis. <i>Arch Pathol Lab Med</i> . 2006;130(10):1466-78.                                     | 773 | 70.27 |
| 67 | Randomised comparison of morbidity after D1 and D2 dissection for gastric cancer in 996 Dutch patients. <i>Lancet</i> . 1995;345(8952):745-8.                                                             | 761 | 34.59 |
| 68 | An international association between <i>Helicobacter pylori</i> infection and gastric cancer. The EUROGAST Study Group. <i>Lancet</i> . 1993;341(8857):1359-62.                                           | 753 | 31.38 |
| 69 | Gastric stromal tumors. Reappraisal of histogenesis. <i>Am J Surg Pathol</i> . 1983;7(6):507-19.                                                                                                          | 751 | 22.09 |

|    |                                                                                                                                                                                                                          |     |        |
|----|--------------------------------------------------------------------------------------------------------------------------------------------------------------------------------------------------------------------------|-----|--------|
| 70 | Chemotherapy in advanced gastric cancer: a systematic review and meta-analysis based on aggregate data. <i>J Clin Oncol.</i> 2006;24(18):2903-9.                                                                         | 747 | 67.91  |
| 71 | Expression of cyclooxygenase-2 in human gastric carcinoma. <i>Cancer research.</i> 1997;57:1276-80.                                                                                                                      | 743 | 37.15  |
| 72 | <i>Campylobacter pylori</i> and peptic ulcer disease. <i>Gastroenterology.</i> 1989;96 :615-25.                                                                                                                          | 731 | 26.11  |
| 73 | Effect of ranitidine and amoxicillin plus metronidazole on the eradication of <i>Helicobacter pylori</i> and the recurrence of duodenal ulcer. <i>N Engl J Med.</i> 1993;328:308-12.                                     | 724 | 30.17  |
| 74 | Inhibition of gastrin and gastric-acid secretion by growth-hormone release-inhibiting hormone. <i>Lancet.</i> 1974;2:1106-9.                                                                                             | 713 | 16.58  |
| 75 | Surgical treatment of gastric cancer: 15-year follow-up results of the randomised nationwide Dutch D1D2 trial. <i>Lancet Oncol.</i> 2010;11(5):439-49.                                                                   | 712 | 101.71 |
| 76 | Prevalence of <i>Helicobacter pylori</i> infection and histologic gastritis in asymptomatic persons. <i>N Engl J Med.</i> 1989;321:1562-6.                                                                               | 709 | 25.32  |
| 77 | A model for gastric cancer epidemiology. <i>Lancet.</i> 1975;2:58-60.                                                                                                                                                    | 709 | 16.88  |
| 78 | American college of gastroenterology guideline on the management of <i>Helicobacter pylori</i> infection. <i>Am J Gastroenterol.</i> 2007;102(8):1808-25. Epub 2007 Jun 29.                                              | 706 | 70.6   |
| 79 | Role of impaired gastric accommodation to a meal in functional dyspepsia. <i>Gastroenterology.</i> 1998;11:1346-52.                                                                                                      | 705 | 37.11  |
| 80 | The response of cells from low-grade B-cell gastric lymphomas of mucosa-associated lymphoid tissue to <i>Helicobacter pylori</i> . <i>Lancet.</i> 1993;342:571-4.                                                        | 705 | 29.38  |
| 81 | E-cadherin gene mutations provide clues to diffuse type gastric carcinomas. <i>Cancer Res.</i> 1994;54:3845-52.                                                                                                          | 685 | 29.78  |
| 82 | Risk for gastric cancer in people with CagA positive or CagA negative <i>Helicobacter pylori</i> infection. <i>Gut.</i> 1997;40:297-301.                                                                                 | 677 | 33.85  |
| 83 | Postoperative morbidity and mortality after D1 and D2 resections for gastric cancer: preliminary results of the MRC randomised controlled surgical trial. The Surgical Cooperative Group. <i>Lancet.</i> 1996;347:995-9. | 677 | 32.24  |
| 84 | Measurement of gastric emptying rate of solids by means of a carbon-labeled octanoic acid breath test. <i>Gastroenterology.</i> 1993;104:1640-7.                                                                         | 670 | 27.92  |
| 85 | Dyspepsia and dyspepsia subgroups: a population-based study. <i>Gastroenterology.</i> 1992;102:1259-68.                                                                                                                  | 654 | 26.16  |
| 86 | E2F1-regulated microRNAs impair TGF beta-dependent cell-cycle arrest and apoptosis in gastric cancer. <i>Cancer Cell.</i> 2008;13(3):272-86.                                                                             | 645 | 71.67  |
| 87 | Prognostic value of vascular endothelial growth factor expression in gastric carcinoma. <i>Cancer.</i> 1996;77:858-63.                                                                                                   | 643 | 30.62  |

|     |                                                                                                                                                                                                                                        |     |        |
|-----|----------------------------------------------------------------------------------------------------------------------------------------------------------------------------------------------------------------------------------------|-----|--------|
| 88  | Omeprazole compared with misoprostol for ulcers associated with nonsteroidal antiinflammatory drugs. Omeprazole versus Misoprostol for NSAID-induced Ulcer Management (OMNIUM) Study Group. <i>N Engl J Med.</i> 1998;338(11):727-34.  | 641 | 33.74  |
| 89  | Increased risk of noncardia gastric cancer associated with proinflammatory cytokine gene polymorphisms. <i>Gastroenterology.</i> 2003;124:1193-201.                                                                                    | 640 | 45.71  |
| 90  | Meta-analysis of the relationship between <i>Helicobacter pylori</i> seropositivity and gastric cancer. <i>Gastroenterology.</i> 1998;114:1169-79.                                                                                     | 638 | 33.58  |
| 91  | Substituted benzimidazoles inhibit gastric acid secretion by blocking (H <sup>+</sup> + K <sup>+</sup> )ATPase. <i>Nature.</i> 1981;290:159-61.                                                                                        | 636 | 17.67  |
| 92  | Ramucirumab monotherapy for previously treated advanced gastric or gastro-oesophageal junction adenocarcinoma (REGARD): an international, randomised, multicentre, placebo-controlled, phase 3 trial. <i>Lancet.</i> 2014; 383: 31-39. | 630 | 210    |
| 93  | Japanese gastric cancer treatment guidelines 2010 (ver. 3). <i>Gastric Cancer.</i> 2011;14(2):113-23.                                                                                                                                  | 623 | 103.83 |
| 94  | Gastric intramucosal pH as a therapeutic index of tissue oxygenation in critically ill patients. <i>Lancet.</i> 1992;339:195-9.                                                                                                        | 623 | 24.92  |
| 95  | Nonsteroidal anti-inflammatory drug use and increased risk for peptic ulcer disease in elderly persons. <i>Ann Intern Med.</i> 1991;114(4):257-63.                                                                                     | 620 | 23.85  |
| 96  | Pyloric <i>Campylobacter</i> infection and gastroduodenal disease. <i>Med J Aust.</i> 1985;142(8):439-44.                                                                                                                              | 620 | 19.38  |
| 97  | <i>Helicobacter pylori</i> and peptic ulcer disease. <i>N Engl J Med.</i> 1991;324:1043-8.                                                                                                                                             | 619 | 23.81  |
| 98  | Long-term sequelae of <i>Helicobacter pylori</i> gastritis. <i>Lancet.</i> 1995;345:1525-8.                                                                                                                                            | 610 | 27.73  |
| 99  | Progress in gastric cancer surgery in Japan and its limits of radicality. <i>World J Surg.</i> 1987;11(4):418-25.                                                                                                                      | 607 | 20.23  |
| 100 | Atrophic gastritis and <i>Helicobacter pylori</i> infection in patients with reflux esophagitis treated with omeprazole or fundoplication. <i>N Engl J Med.</i> 1996;334:1018-22.                                                      | 604 | 28.76  |

---
